# Supplementary material for: Human leukocyte antigen I is significantly downregulated in patients with myxoid liposarcomas
Source: Springer Nature journal article supplement (doi:10.1007/s00262-021-02928-1), 2021-04-24
Supplement: MOESM1 [file 19101638]

Supplementary table. 1

| Marker      | Clonality  | Clone name | Species | Dilution | Vendor                            | Positive control                     | Negative control                    |
|-------------|------------|------------|---------|----------|-----------------------------------|--------------------------------------|-------------------------------------|
| CD4         | Monoclonal | 4B12       | Mouse   | 1:50     | Nichirei Bioscience, Tokyo, Japan | Tonsil                               | Tonsil (epithelial cells)           |
| CD8         | Monoclonal | C8/144B    | Mouse   | 1:200    | Nichirei Bioscience, Tokyo, Japan | Tonsil                               | Tonsil (epithelial cells)           |
| FOXP3       | Monoclonal | 236A/E7    | Mouse   | 1:200    | Abcam, Cambridge, UK              | Tonsil                               | Mouse IgG instead of first antibody |
| CD163       | Monoclonal | 10D6       | Mouse   | 1:500    | Leica, Wetzlar, Germany           | Tonsil                               | Tonsil (epithelial cells)           |
| HLA class I | Monoclonal | EMR8-5     | Mouse   | 1:500    | Hokudo, Sapporo, Japan            | Internal control (endothelial cells) | Dermatofibrosarcoma protuberans     |
| PD-L1       | Monoclonal | 28-8       | Rabbit  | 1:200    | Abcam, Cambridge, UK              | Non-small cell lung cancer           | MCF-7 (Brest cancer cell line)      |
