# Supplementary material for: Human leukocyte antigen I is significantly downregulated in patients with myxoid liposarcomas
Source: Springer Nature journal article supplement (doi:10.1007/s00262-021-02928-1), 2021-04-24
Supplement: MOESM2 [file 19101638]

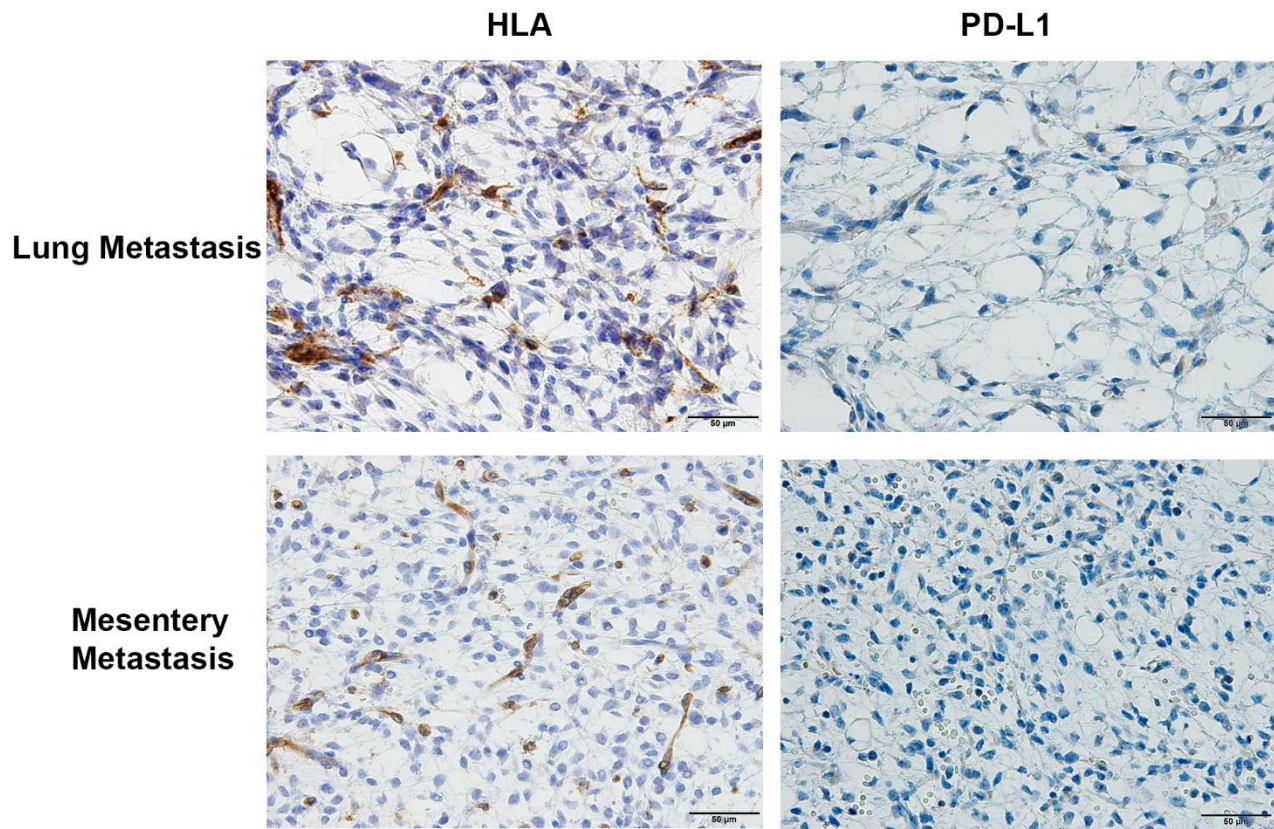

**Supplementary Figure.1** Expression of HLA class I and Programmed death ligand 1 (PD-L1) in metastatic specimens of myxoid liposarcoma.

Both patients with lung metastases and mesentery metastasis were also negative for HLA class I (Left) and PD-L1 (Right). Scale bar represents 50  $\mu\text{m}$

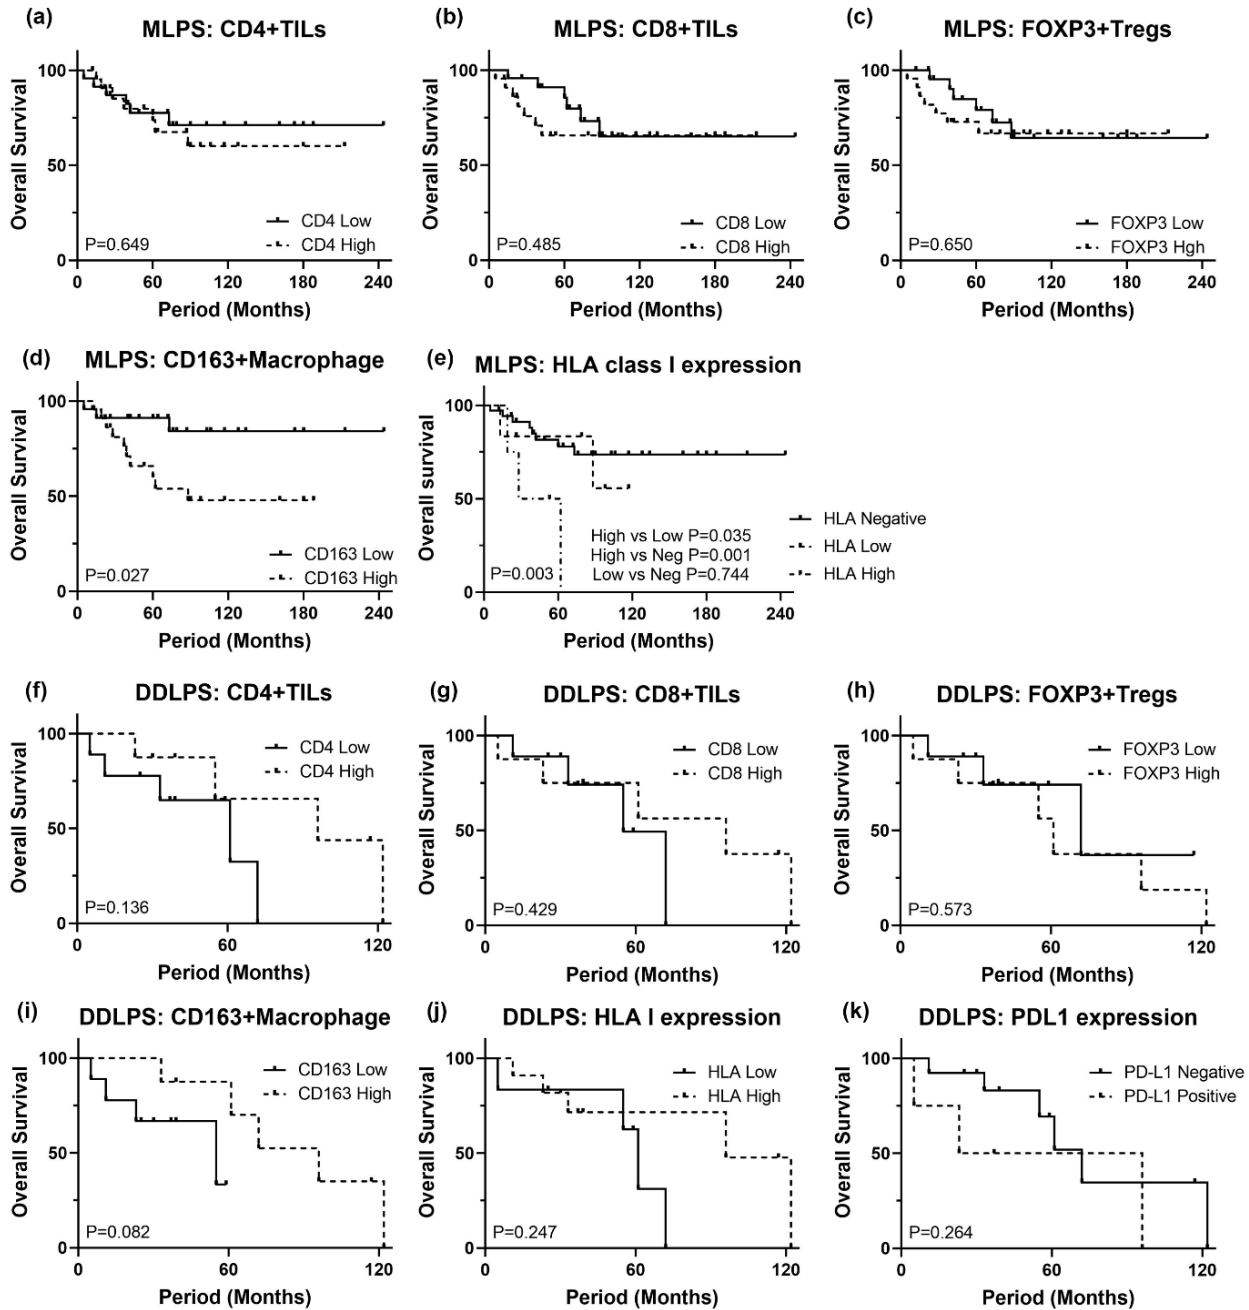

**Supplementary Figure.2** Kaplan-Meier curves illustrating Overall survival (OS) in MLPS and DDLPS.

The number of CD4+ TILs, CD8+ TILs, or FOXP3+Tregs do not show impact on OS in MLPS patients (a-c) while higher number of CD163+ macrophages or negative expression of HLA class I were associated with unfavorable OS in patients with MLPS (d, e). Although no immune characteristics were found to be significantly associated with difference of OS in patients with DDLPS, patients with higher

infiltration of CD163 macrophages showed a trend toward favorable prognosis. **(f-k)**.

MLPS: Myxoid liposarcoma, DDLPS: Dedifferentiated liposarcoma
